# Supplementary material for: The BET Bromodomain Inhibitor OTX015 Affects Pathogenetic Pathways in Preclinical B-cell Tumor Models and Synergizes with Targeted Drugs
Source: Oxford University Press journal article supplement (doi:10.1158/1078-0432.ccr-14-1561), 2015-01-26
Supplement: 10780432ccr141561-sup-133499_2_supp_2813921_nhv9bt.docx [file 10780432ccr141561-sup-133499_2_supp_2813921_nhv9bt.docx]

**Supplemental Table S4. Lists of the GSEA significant gene-sets across DLBCL cell lines according to higher (A) of lower (B) sensitivity to OTX015.** Up to the ten most significantly enriched gene-sets for each studied gene-sets collection are shown.

| **Table S4** |  |  |  |  |
| --- | --- | --- | --- | --- |
| **MSigDB Collections** | **name** | **normalized enrichment score** | **Nominal p value** | **FDR q-val** |
| C2: Reactome | INTERFERON_SIGNALING | 2.56E+00 | 0.00E+00 | 0.00E+00 |
| C2: Reactome | INTERFERON_GAMMA_SIGNALING | 2.49E+00 | 0.00E+00 | 0.00E+00 |
| C2: Reactome | INTERFERON_ALPHA_BETA_SIGNALING | 2.48E+00 | 0.00E+00 | 0.00E+00 |
| C2: Reactome | CYTOKINE_SIGNALING_IN_IMMUNE_SYSTEM | 2.25E+00 | 0.00E+00 | 0.00E+00 |
| C2: Reactome | GLYCOLYSIS | 2.05E+00 | 0.00E+00 | 8.27E-04 |
| C2: Reactome | REGULATION_OF_IFNA_SIGNALING | 1.92E+00 | 0.00E+00 | 8.60E-03 |
| C2: Reactome | ANTIVIRAL_MECHANISM_BY_IFN_STIMULATED_GENES | 1.74E+00 | 0.00E+00 | 1.00E-01 |
| C2: Reactome | CHONDROITIN_SULFATE_BIOSYNTHESIS | 1.73E+00 | 2.13E-03 | 1.09E-01 |
| C2: Reactome | TRAF6_MEDIATED_IRF7_ACTIVATION | 1.73E+00 | 4.16E-03 | 9.70E-02 |
| C2: Reactome | COSTIMULATION_BY_THE_CD28_FAMILY | 1.72E+00 | 4.04E-03 | 9.88E-02 |
| C2: BioCarta | IL6_PATHWAY | 1.91E+00 | 0.00E+00 | 3.39E-02 |
| C2: BioCarta | INFLAM_PATHWAY | 1.82E+00 | 0.00E+00 | 6.30E-02 |
| C2: BioCarta | IL10_PATHWAY | 1.82E+00 | 0.00E+00 | 4.38E-02 |
| C2: BioCarta | ERYTH_PATHWAY | 1.76E+00 | 0.00E+00 | 7.18E-02 |
| C2: BioCarta | IL22BP_PATHWAY | 1.70E+00 | 6.20E-03 | 1.20E-01 |
| C2: BioCarta | DC_PATHWAY | 1.70E+00 | 8.32E-03 | 1.04E-01 |
| C2: BioCarta | EGF_PATHWAY | 1.67E+00 | 1.13E-02 | 1.19E-01 |
| C2: BioCarta | PDGF_PATHWAY | 1.61E+00 | 2.11E-02 | 1.72E-01 |
| C2: BioCarta | IL12_PATHWAY | 1.59E+00 | 3.20E-02 | 1.85E-01 |
| C2: BioCarta | PTEN_PATHWAY | 1.56E+00 | 3.63E-02 | 2.15E-01 |
| C2: chemical and genetic perturbations | TAKEDA_TARGETS_OF_NUP98_HOXA9_FUSION_3D_UP | 2.51E+00 | 0.00E+00 | 0.00E+00 |
| C2: chemical and genetic perturbations | HECKER_IFNB1_TARGETS | 2.51E+00 | 0.00E+00 | 0.00E+00 |
| C2: chemical and genetic perturbations | BROWNE_INTERFERON_RESPONSIVE_GENES | 2.42E+00 | 0.00E+00 | 0.00E+00 |
| C2: chemical and genetic perturbations | SANA_RESPONSE_TO_IFNG_UP | 2.40E+00 | 0.00E+00 | 0.00E+00 |
| C2: chemical and genetic perturbations | DAUER_STAT3_TARGETS_DN | 2.34E+00 | 0.00E+00 | 0.00E+00 |
| C2: chemical and genetic perturbations | BROCKE_APOPTOSIS_REVERSED_BY_IL6 | 2.33E+00 | 0.00E+00 | 0.00E+00 |
| C2: chemical and genetic perturbations | ICHIBA_GRAFT_VERSUS_HOST_DISEASE_D7_UP | 2.31E+00 | 0.00E+00 | 0.00E+00 |
| C2: chemical and genetic perturbations | ELVIDGE_HYPOXIA_BY_DMOG_UP | 2.31E+00 | 0.00E+00 | 0.00E+00 |
| C2: chemical and genetic perturbations | MOSERLE_IFNA_RESPONSE | 2.29E+00 | 0.00E+00 | 0.00E+00 |
| C2: chemical and genetic perturbations | ELVIDGE_HYPOXIA_UP | 2.28E+00 | 0.00E+00 | 0.00E+00 |
| C2: KEGG | TYPE_I_DIABETES_MELLITUS | 1.91E+00 | 0.00E+00 | 1.02E-02 |
| C2: KEGG | GRAFT_VERSUS_HOST_DISEASE | 1.84E+00 | 0.00E+00 | 1.94E-02 |
| C2: KEGG | CYTOSOLIC_DNA_SENSING_PATHWAY | 1.80E+00 | 2.01E-03 | 2.32E-02 |
| C2: KEGG | GLYCOSAMINOGLYCAN_BIOSYNTHESIS_CHONDROITIN_SULFATE | 1.77E+00 | 2.00E-03 | 2.79E-02 |
| C2: KEGG | LEISHMANIA_INFECTION | 1.76E+00 | 2.01E-03 | 3.02E-02 |
| C2: KEGG | ALLOGRAFT_REJECTION | 1.71E+00 | 3.88E-03 | 4.64E-02 |
| C2: KEGG | TOLL_LIKE_RECEPTOR_SIGNALING_PATHWAY | 1.71E+00 | 0.00E+00 | 4.25E-02 |
| C2: KEGG | CELL_ADHESION_MOLECULES_CAMS | 1.70E+00 | 0.00E+00 | 4.15E-02 |
| C2: KEGG | GLYCOLYSIS_GLUCONEOGENESIS | 1.68E+00 | 4.05E-03 | 4.43E-02 |
| C2: KEGG | JAK_STAT_SIGNALING_PATHWAY | 1.60E+00 | 0.00E+00 | 9.09E-02 |
| C3: transcription factor targets | V$AR_01 | 1.83E+00 | 0.00E+00 | 1.61E-02 |
| C3: transcription factor targets | V$IRF1_01 | 1.77E+00 | 0.00E+00 | 2.61E-02 |
| C3: transcription factor targets | V$AP1_Q4 | 1.77E+00 | 0.00E+00 | 1.79E-02 |
| C3: transcription factor targets | YWATTWNNRGCT_UNKNOWN | 1.76E+00 | 0.00E+00 | 1.34E-02 |
| C3: transcription factor targets | V$AP1FJ_Q2 | 1.75E+00 | 0.00E+00 | 1.26E-02 |
| C3: transcription factor targets | V$IRF_Q6 | 1.74E+00 | 0.00E+00 | 1.28E-02 |
| C3: transcription factor targets | YGACNNYACAR_UNKNOWN | 1.72E+00 | 0.00E+00 | 1.89E-02 |
| C3: transcription factor targets | V$IRF2_01 | 1.70E+00 | 0.00E+00 | 2.15E-02 |
| C3: transcription factor targets | V$AP1_Q2 | 1.69E+00 | 0.00E+00 | 2.03E-02 |
| C3: transcription factor targets | V$IRF7_01 | 1.69E+00 | 0.00E+00 | 1.96E-02 |
| C5: GO biological process | CARBOXYLIC_ACID_TRANSPORT | 1.78E+00 | 0.00E+00 | 4.53E-01 |
| C5: GO biological process | NEGATIVE_REGULATION_OF_CELLULAR_PROTEIN_METABOLIC_PROCESS | 1.78E+00 | 0.00E+00 | 2.41E-01 |
| C5: GO biological process | ORGANIC_ACID_TRANSPORT | 1.75E+00 | 3.89E-03 | 2.19E-01 |
| C5: GO cellular component | NUCLEOLAR_PART | 1.77E+00 | 2.02E-03 | 1.67E-01 |
| C5: GO cellular component | DENDRITE | 1.68E+00 | 2.69E-02 | 2.28E-01 |
| C5: GO cellular component | CELL_JUNCTION | 1.68E+00 | 4.16E-03 | 1.64E-01 |
| C5: GO cellular component | SECRETORY_GRANULE | 1.65E+00 | 1.40E-02 | 1.54E-01 |
| C5: GO cellular component | TIGHT_JUNCTION | 1.63E+00 | 6.07E-03 | 1.54E-01 |
| C5: GO cellular component | ENDOPLASMIC_RETICULUM | 1.62E+00 | 0.00E+00 | 1.44E-01 |
| C5: GO cellular component | MICROSOME | 1.61E+00 | 8.08E-03 | 1.34E-01 |
| C5: GO cellular component | VESICULAR_FRACTION | 1.61E+00 | 1.79E-02 | 1.20E-01 |
| C5: GO cellular component | INTERCELLULAR_JUNCTION | 1.58E+00 | 4.04E-03 | 1.33E-01 |
| C5: GO cellular component | APICAL_JUNCTION_COMPLEX | 1.55E+00 | 2.12E-02 | 1.63E-01 |
| C5: GO molecular function | OXIDOREDUCTASE_ACTIVITY_GO_0016705 | 1.80E+00 | 2.05E-03 | 2.00E-01 |
| C6: oncogenic signatures | LTE2_UP.V1_DN | 2.01E+00 | 0.00E+00 | 0.00E+00 |
| C6: oncogenic signatures | E2F1_UP.V1_DN | 1.95E+00 | 0.00E+00 | 5.53E-04 |
| C6: oncogenic signatures | EGFR_UP.V1_UP | 1.87E+00 | 0.00E+00 | 2.69E-03 |
| C6: oncogenic signatures | STK33_UP | 1.87E+00 | 0.00E+00 | 2.01E-03 |
| C6: oncogenic signatures | STK33_NOMO_UP | 1.77E+00 | 0.00E+00 | 5.76E-03 |
| C6: oncogenic signatures | P53_DN.V1_DN | 1.74E+00 | 0.00E+00 | 7.05E-03 |
| C6: oncogenic signatures | MEK_UP.V1_DN | 1.71E+00 | 0.00E+00 | 7.36E-03 |
| C6: oncogenic signatures | STK33_SKM_UP | 1.70E+00 | 0.00E+00 | 7.89E-03 |
| C6: oncogenic signatures | WNT_UP.V1_DN | 1.69E+00 | 0.00E+00 | 7.67E-03 |
| C6: oncogenic signatures | RB_P130_DN.V1_DN | 1.68E+00 | 0.00E+00 | 9.27E-03 |

| **Table S4B** |  |  |  |  |
| --- | --- | --- | --- | --- |
| **MSigDB Collections** | **Name** | **normalized enrichment score** | **Nominal p value** | **FDR q-val** |
| C2: Reactome | CELL_CYCLE | -1.99E+00 | 0.00E+00 | 7.88E-03 |
| C2: Reactome | MITOTIC_PROMETAPHASE | -1.96E+00 | 0.00E+00 | 1.23E-02 |
| C2: Reactome | CELL_CYCLE_MITOTIC | -1.94E+00 | 0.00E+00 | 1.10E-02 |
| C2: Reactome | DNA_REPLICATION | -1.93E+00 | 0.00E+00 | 9.70E-03 |
| C2: Reactome | DOUBLE_STRAND_BREAK_REPAIR | -1.92E+00 | 0.00E+00 | 9.74E-03 |
| C2: Reactome | G2_M_CHECKPOINTS | -1.91E+00 | 0.00E+00 | 8.76E-03 |
| C2: Reactome | G0_AND_EARLY_G1 | -1.90E+00 | 0.00E+00 | 8.90E-03 |
| C2: Reactome | CHROMOSOME_MAINTENANCE | -1.87E+00 | 0.00E+00 | 1.38E-02 |
| C2: Reactome | DNA_STRAND_ELONGATION | -1.87E+00 | 2.02E-03 | 1.23E-02 |
| C2: Reactome | G1_S_SPECIFIC_TRANSCRIPTION | -1.87E+00 | 0.00E+00 | 1.11E-02 |
| C2: BioCarta | G2_PATHWAY | -2.09E+00 | 0.00E+00 | 8.99E-04 |
| C2: BioCarta | MEF2D_PATHWAY | -1.83E+00 | 2.01E-03 | 4.04E-02 |
| C2: BioCarta | ATM_PATHWAY | -1.75E+00 | 5.95E-03 | 8.24E-02 |
| C2: BioCarta | ATRBRCA_PATHWAY | -1.74E+00 | 1.99E-03 | 7.15E-02 |
| C2: BioCarta | PGC1A_PATHWAY | -1.71E+00 | 8.11E-03 | 9.03E-02 |
| C2: BioCarta | NFAT_PATHWAY | -1.62E+00 | 7.72E-03 | 1.88E-01 |
| C2: BioCarta | MITOCHONDRIA_PATHWAY | -1.60E+00 | 2.71E-02 | 1.85E-01 |
| C2: BioCarta | CALCINEURIN_PATHWAY | -1.58E+00 | 2.31E-02 | 2.02E-01 |
| C2: BioCarta | MPR_PATHWAY | -1.58E+00 | 1.21E-02 | 1.82E-01 |
| C2: BioCarta | CHEMICAL_PATHWAY | -1.57E+00 | 3.38E-02 | 1.72E-01 |
| C2: BioCarta | NOS1_PATHWAY | -1.55E+00 | 2.73E-02 | 1.87E-01 |
| C2: chemical and genetic perturbations | ROSTY_CERVICAL_CANCER_PROLIFERATION_CLUSTER | -2.59E+00 | 0.00E+00 | 0.00E+00 |
| C2: chemical and genetic perturbations | ZHOU_CELL_CYCLE_GENES_IN_IR_RESPONSE_6HR | -2.45E+00 | 0.00E+00 | 0.00E+00 |
| C2: chemical and genetic perturbations | SOTIRIOU_BREAST_CANCER_GRADE_1_VS_3_UP | -2.36E+00 | 0.00E+00 | 0.00E+00 |
| C2: chemical and genetic perturbations | ZHOU_CELL_CYCLE_GENES_IN_IR_RESPONSE_24HR | -2.34E+00 | 0.00E+00 | 0.00E+00 |
| C2: chemical and genetic perturbations | KONG_E2F3_TARGETS | -2.32E+00 | 0.00E+00 | 0.00E+00 |
| C2: chemical and genetic perturbations | WHITFIELD_CELL_CYCLE_LITERATURE | -2.32E+00 | 0.00E+00 | 0.00E+00 |
| C2: chemical and genetic perturbations | PUJANA_XPRSS_INT_NETWORK | -2.32E+00 | 0.00E+00 | 0.00E+00 |
| C2: chemical and genetic perturbations | WINNEPENNINCKX_MELANOMA_METASTASIS_UP | -2.31E+00 | 0.00E+00 | 0.00E+00 |
| C2: chemical and genetic perturbations | KAUFFMANN_MELANOMA_RELAPSE_UP | -2.31E+00 | 0.00E+00 | 0.00E+00 |
| C2: chemical and genetic perturbations | ISHIDA_E2F_TARGETS | -2.30E+00 | 0.00E+00 | 0.00E+00 |
| C2: KEGG | DNA_REPLICATION | -1.98E+00 | 0.00E+00 | 9.65E-04 |
| C2: KEGG | CELL_CYCLE | -1.92E+00 | 0.00E+00 | 2.24E-03 |
| C2: KEGG | MISMATCH_REPAIR | -1.89E+00 | 0.00E+00 | 2.10E-03 |
| C2: KEGG | GLYCINE_SERINE_AND_THREONINE_METABOLISM | -1.84E+00 | 3.80E-03 | 8.35E-03 |
| C2: KEGG | P53_SIGNALING_PATHWAY | -1.74E+00 | 0.00E+00 | 2.95E-02 |
| C2: KEGG | HOMOLOGOUS_RECOMBINATION | -1.69E+00 | 6.29E-03 | 4.64E-02 |
| C2: KEGG | PATHOGENIC_ESCHERICHIA_COLI_INFECTION | -1.64E+00 | 8.20E-03 | 7.33E-02 |
| C3: transcription factor targets | V$E2F_03 | -1.84E+00 | 0.00E+00 | 6.63E-03 |
| C3: transcription factor targets | V$E2F_Q6_01 | -1.77E+00 | 0.00E+00 | 1.04E-02 |
| C3: transcription factor targets | V$E2F1_Q4_01 | -1.77E+00 | 0.00E+00 | 8.50E-03 |
| C3: transcription factor targets | V$E2F_Q4_01 | -1.76E+00 | 0.00E+00 | 7.02E-03 |
| C3: transcription factor targets | V$E2F_Q3 | -1.72E+00 | 0.00E+00 | 1.20E-02 |
| C3: transcription factor targets | V$E2F_Q3_01 | -1.71E+00 | 0.00E+00 | 1.18E-02 |
| C3: transcription factor targets | V$E2F1_Q4 | -1.66E+00 | 0.00E+00 | 2.03E-02 |
| C5: GO biological process | CELL_CYCLE_CHECKPOINT_GO_0000075 | -1.90E+00 | 0.00E+00 | 5.96E-02 |
| C5: GO biological process | CELL_DIVISION | -1.86E+00 | 0.00E+00 | 6.43E-02 |
| C5: GO biological process | CYTOKINESIS | -1.85E+00 | 2.05E-03 | 5.51E-02 |
| C5: GO biological process | MITOTIC_CELL_CYCLE_CHECKPOINT | -1.81E+00 | 3.98E-03 | 7.10E-02 |
| C5: GO biological process | DNA_RECOMBINATION | -1.78E+00 | 0.00E+00 | 8.77E-02 |
| C5: GO biological process | MEIOTIC_CELL_CYCLE | -1.74E+00 | 1.02E-02 | 1.37E-01 |
| C5: GO biological process | M_PHASE | -1.73E+00 | 0.00E+00 | 1.22E-01 |
| C5: GO biological process | CHROMATIN_ASSEMBLY_OR_DISASSEMBLY | -1.73E+00 | 7.80E-03 | 1.10E-01 |
| C5: GO biological process | DNA_METABOLIC_PROCESS | -1.73E+00 | 0.00E+00 | 1.04E-01 |
| C5: GO biological process | CELL_CYCLE_PROCESS | -1.71E+00 | 0.00E+00 | 1.09E-01 |
| C5: GO cellular component | CHROMOSOMEPERICENTRIC_REGION | -1.87E+00 | 2.07E-03 | 2.55E-02 |
| C5: GO cellular component | CHROMOSOME | -1.84E+00 | 0.00E+00 | 2.38E-02 |
| C5: GO cellular component | CHROMOSOMAL_PART | -1.81E+00 | 1.88E-03 | 2.58E-02 |
| C5: GO cellular component | KINETOCHORE | -1.79E+00 | 1.89E-03 | 2.42E-02 |
| C5: GO cellular component | SPINDLE_POLE | -1.74E+00 | 3.91E-03 | 3.81E-02 |
| C5: GO cellular component | SPINDLE | -1.74E+00 | 9.78E-03 | 3.40E-02 |
| C5: GO cellular component | CENTROSOME | -1.73E+00 | 1.95E-03 | 3.01E-02 |
| C5: GO cellular component | SPINDLE_MICROTUBULE | -1.67E+00 | 8.02E-03 | 5.86E-02 |
| C5: GO cellular component | CHROMATIN_REMODELING_COMPLEX | -1.66E+00 | 1.65E-02 | 5.50E-02 |
| C5: GO cellular component | MICROTUBULE_CYTOSKELETON | -1.66E+00 | 0.00E+00 | 5.01E-02 |
| C6: oncogenic signatures | RB_P107_DN.V1_UP | -1.80E+00 | 0.00E+00 | 6.14E-03 |
| C6: oncogenic signatures | GCNP_SHH_UP_EARLY.V1_UP | -1.70E+00 | 0.00E+00 | 2.07E-02 |
| C6: oncogenic signatures | E2F3_UP.V1_UP | -1.68E+00 | 0.00E+00 | 1.81E-02 |
| C6: oncogenic signatures | RB_DN.V1_UP | -1.68E+00 | 0.00E+00 | 1.45E-02 |
| C6: oncogenic signatures | KRAS.LUNG.BREAST_UP.V1_DN | -1.61E+00 | 0.00E+00 | 2.77E-02 |
| C6: oncogenic signatures | PRC2_EZH2_UP.V1_UP | -1.58E+00 | 0.00E+00 | 3.48E-02 |
| C6: oncogenic signatures | BCAT_BILD_ET_AL_DN | -1.57E+00 | 1.36E-02 | 3.52E-02 |
| C6: oncogenic signatures | KRAS.50_UP.V1_DN | -1.55E+00 | 1.15E-02 | 3.64E-02 |
| C6: oncogenic signatures | P53_DN.V1_UP | -1.53E+00 | 0.00E+00 | 4.45E-02 |
| C6: oncogenic signatures | MTOR_UP.N4.V1_DN | -1.53E+00 | 5.95E-03 | 4.16E-02 |
